# Supplementary material for: Genetic Recombination Is Targeted towards Gene Promoter Regions in Dogs
Source: PubMed Central journal article supplement (PMC3861134; doi:10.1371/journal.pgen.1003984), 2013-12-12

JF750638.1|Canis\_lupus\_familiaris\_Beagle  
JF750639.1|Canis\_lupus\_familiaris\_Portuguese\_Water\_Dog  
JF750640.1|Canis\_lupus\_familiaris\_Bearded\_Collie  
JF750641.1|Canis\_lupus\_familiaris\_Standard\_Poodle  
JF750642.1|Canis\_lupus\_familiaris\_Boxer  
JF750643.1|Canis\_lupus\_familiaris\_Dalmatian  
JF750644.1|Canis\_lupus\_familiaris\_Labrador\_retriever  
JF750645.1|Canis\_lupus\_familiaris\_German\_Shepard  
JF750646.1|Canis\_lupus\_familiaris\_Rough\_Collie  
JF750647.1|Canis\_lupus\_familiaris\_Eurasier  
JF750648.1|Canis\_lupus\_familiaris\_Polish\_Lowland\_Sheepdog  
JF750649.1|Canis\_lupus\_familiaris\_Rottweiler  
JF750650.1|Canis\_lupus\_familiaris\_Smalandsstovare  
JF750651.1|Canis\_lupus\_familiaris\_Swedish\_Elkhound  
JF750652.1|Canis\_lupus\_familiaris\_Nova\_Scotia\_Duck\_Tolling\_Retriever  
JF750653.1|Canis\_lupus\_isolate\_ref21  
JF750654.1|Canis\_lupus\_isolate\_ref34  
JF750655.1|Vulpes\_vulpes  
JF750656.1|Speothos\_venaticus  
JF750657.1|Lycyon\_pictus  
JF750658.1|Canis\_mesomelas  
JF750659.1|Canis\_aureus  
Island\_Fox(Urocyon\_litoralis)  
Cuipoji\_ycaotepex\_culpeus

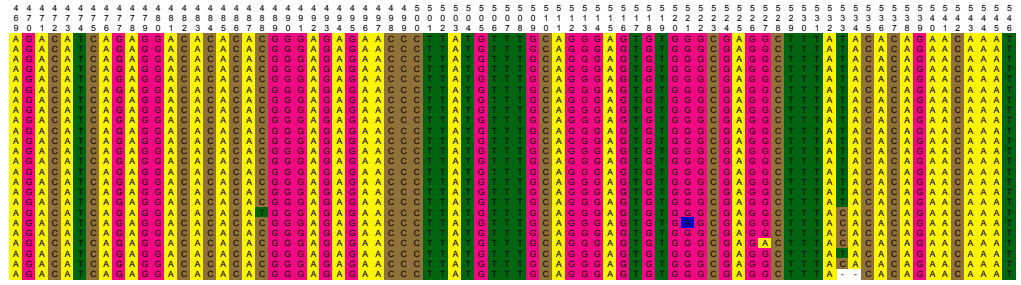

JF750638.1|Canis\_lupus\_familiaris\_Beagle  
JF750639.1|Canis\_lupus\_familiaris\_Portuguese\_Water\_Dog  
JF750640.1|Canis\_lupus\_familiaris\_Bearded\_Collie  
JF750641.1|Canis\_lupus\_familiaris\_Standard\_Poodle  
JF750642.1|Canis\_lupus\_familiaris\_Boxer  
JF750643.1|Canis\_lupus\_familiaris\_Dalmatian  
JF750644.1|Canis\_lupus\_familiaris\_Labrador\_retriever  
JF750645.1|Canis\_lupus\_familiaris\_German\_Shepard  
JF750646.1|Canis\_lupus\_familiaris\_Rough\_Collie  
JF750647.1|Canis\_lupus\_familiaris\_Eurasier  
JF750648.1|Canis\_lupus\_familiaris\_Polish\_Lowland\_Sheepdog  
JF750649.1|Canis\_lupus\_familiaris\_Rottweiler  
JF750650.1|Canis\_lupus\_familiaris\_Smalandsstovare  
JF750651.1|Canis\_lupus\_familiaris\_Swedish\_Elkhound  
JF750652.1|Canis\_lupus\_familiaris\_Nova\_Scotia\_Duck\_Tolling\_Retriever  
JF750653.1|Canis\_lupus\_isolate\_ref21  
JF750654.1|Canis\_lupus\_isolate\_ref34  
JF750655.1|Vulpes\_vulpes  
JF750656.1|Speothos\_venaticus  
JF750657.1|Lycyon\_pictus  
JF750658.1|Canis\_mesomelas  
JF750659.1|Canis\_aureus  
Island\_Fox(Urocyon\_litoralis)  
Cuipoji\_ycaotepex\_culpeus

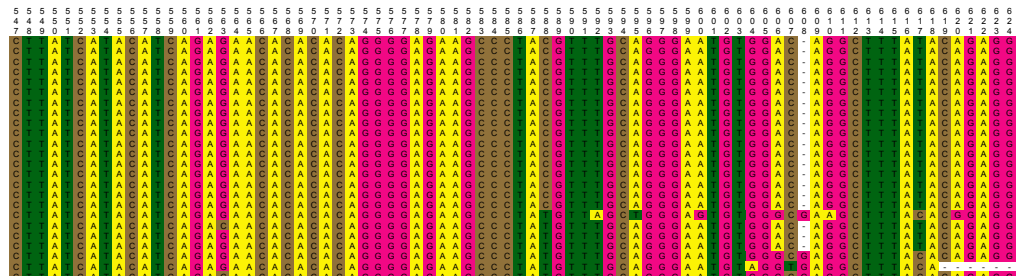

JF750638.1|Canis\_lupus\_familiaris\_Beagle  
JF750639.1|Canis\_lupus\_familiaris\_Portuguese\_Water\_Dog  
JF750640.1|Canis\_lupus\_familiaris\_Bearded\_Collie  
JF750641.1|Canis\_lupus\_familiaris\_Standard\_Poodle  
JF750642.1|Canis\_lupus\_familiaris\_Boxer  
JF750643.1|Canis\_lupus\_familiaris\_Dalmatian  
JF750644.1|Canis\_lupus\_familiaris\_Labrador\_retriever  
JF750645.1|Canis\_lupus\_familiaris\_German\_Shepard  
JF750646.1|Canis\_lupus\_familiaris\_Rough\_Collie  
JF750647.1|Canis\_lupus\_familiaris\_Eurasier  
JF750648.1|Canis\_lupus\_familiaris\_Polish\_Lowland\_Sheepdog  
JF750649.1|Canis\_lupus\_familiaris\_Rottweiler  
JF750650.1|Canis\_lupus\_familiaris\_Smalandsstovare  
JF750651.1|Canis\_lupus\_familiaris\_Swedish\_Elkhound  
JF750652.1|Canis\_lupus\_familiaris\_Nova\_Scotia\_Duck\_Tolling\_Retriever  
JF750653.1|Canis\_lupus\_isolate\_ref21  
JF750654.1|Canis\_lupus\_isolate\_ref34  
JF750655.1|Vulpes\_vulpes  
JF750656.1|Speothos\_venaticus  
JF750657.1|Lycyon\_pictus  
JF750658.1|Canis\_mesomelas  
JF750659.1|Canis\_aureus  
Island\_Fox(Urocyon\_litoralis)  
Cuipoji\_ycaotepex\_culpeus

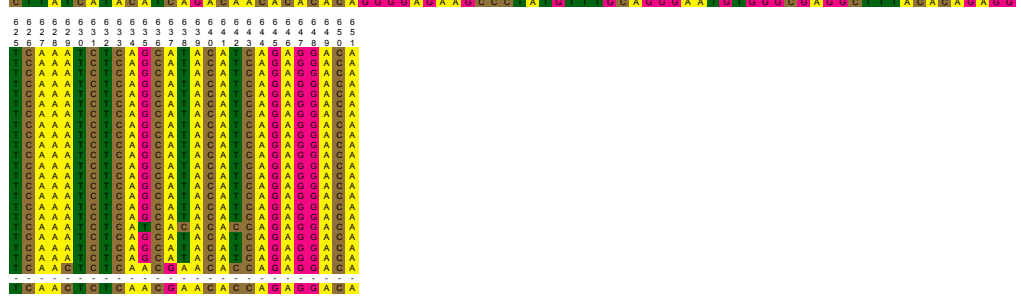

Supplement: pgen.1003984.s017.pdf [file pgen.1003984.s017.pdf]
