# Supplementary material for: Genetic Recombination Is Targeted towards Gene Promoter Regions in Dogs
Source: PubMed Central journal article supplement (PMC3861134; doi:10.1371/journal.pgen.1003984), 2013-12-12
Supplement: pgen.1003984.s014.pdf [file pgen.1003984.s014.pdf]

**Table S1: Locations of collected samples**

| <b>Population/region</b> | <b>N</b> | <b>Individuals</b>                                                                                                                   |
|--------------------------|----------|--------------------------------------------------------------------------------------------------------------------------------------|
| China (north)            | 8        | Xilin Basset, Chow chow, Shar pei, Sichuan Liangshan dog, Sichuan Qingchuan dog, Chongqing dog, Guizhou Xiasi dog, Chinese field dog |
| China (south)            | 6        | Kunming dog, Shandong canine, Shaanxi canine, Hebei canine, Mongolia canine, Kazakhstan shepherd dog                                 |
| Europe                   | 6        | Labrador retriever, Caucasian shepherd, Portugal village dog (2), Croatia village dog, Bosnia village dog                            |
| India                    | 6        | Tibetan mastiff/shepherd mix, village dog (5)                                                                                        |
| Mideast                  | 8        | Afghan hound, Egypt village dog (2), Lebanon village dog (3), Qatar village dog (2)                                                  |
| Oceania                  | 7        | Borneo village dog (3), Papua New Guinea village dog (3), Taiwan village dog                                                         |
| Vietnam                  | 6        | Village dog (6)                                                                                                                      |
| Other                    | 4        | Xoloitzcuintl, Namibia village dog (3)                                                                                               |
