# Supplementary material for: Genetic Recombination Is Targeted towards Gene Promoter Regions in Dogs
Source: PubMed Central journal article supplement (PMC3861134; doi:10.1371/journal.pgen.1003984), 2013-12-12
Supplement: pgen.1003984.s015.pdf [file pgen.1003984.s015.pdf]

**Table S2: Details of sequence coverage**

| <b>Dog ID</b> | <b>Population</b>                  | <b>Mean Autosomal Coverage</b> |
|---------------|------------------------------------|--------------------------------|
| 1735          | Afghan Hound                       | 6.89                           |
| 2972          | Labrador Retriever                 | 9.05                           |
| 4669          | Xoloitzcuintli                     | 13.97                          |
| BA19          | Bosnia (Tornjak)                   | 7.10                           |
| Dog01         | China                              | 7.41                           |
| Dog02         | China                              | 8.13                           |
| Dog03         | China                              | 7.97                           |
| Dog04         | China                              | 7.41                           |
| Dog06         | China                              | 7.89                           |
| Dog07         | China                              | 6.62                           |
| Dog08         | China                              | 7.80                           |
| Dog09         | China                              | 7.41                           |
| Dog10         | China                              | 7.85                           |
| Dog11         | China                              | 7.46                           |
| Dog12         | China                              | 7.89                           |
| Dog13         | China                              | 8.22                           |
| Dog14         | China                              | 7.91                           |
| Dog15         | China                              | 7.70                           |
| EG44          | Egypt                              | 7.79                           |
| EG49          | Egypt                              | 7.01                           |
| HR85          | Bosnia (Istrian Shorthaired Hound) | 7.73                           |
| HR93          | Bosnia (Caucasian Ovcharka)        | 9.13                           |
| ID125         | India                              | 12.66                          |
| ID137         | India                              | 7.20                           |
| ID165         | India                              | 9.47                           |
| ID168         | India (Tibetan Masiff mix)         | 8.34                           |
| ID60          | India                              | 13.02                          |
| ID91          | India                              | 7.50                           |
| IN18          | Borneo                             | 4.94                           |
| IN23          | Borneo                             | 6.95                           |
| IN29          | Borneo                             | 5.74                           |
| LB74          | Lebanon                            | 8.37                           |
| LB79          | Lebanon                            | 8.76                           |
| LB85          | Lebanon                            | 8.61                           |
| NA63          | Namibia                            | 7.62                           |
| NA8           | Namibia                            | 12.77                          |
| NA89          | Namibia                            | 7.08                           |
| PG115         | Papua New Guinea                   | 8.03                           |
| PG122         | Papua New Guinea                   | 5.75                           |
| PG84          | Papua New Guinea                   | 15.00                          |
| PT61          | Portugal                           | 15.68                          |
| PT71          | Portugal                           | 13.77                          |
| QA27          | Qatar                              | 12.38                          |
| QA5           | Qatar                              | 6.06                           |
| TW04          | Taiwan                             | 14.94                          |
| VN21          | Vietnam                            | 9.04                           |
| VN37          | Vietnam                            | 6.77                           |
| VN4           | Vietnam                            | 9.10                           |
| VN42          | Vietnam                            | 9.08                           |
| VN59          | Vietnam                            | 8.64                           |
| VN76          | Vietnam                            | 6.11                           |
