# Supplementary material for: Genetic Recombination Is Targeted towards Gene Promoter Regions in Dogs
Source: PubMed Central journal article supplement (PMC3861134; doi:10.1371/journal.pgen.1003984), 2013-12-12
Supplement: pgen.1003984.s016.pdf [file pgen.1003984.s016.pdf]

**Table S3: Predictors of recombination rate**

**Correlation (Pearson coefficient, r)**

|       | GC content | CpG content | Genes*  |
|-------|------------|-------------|---------|
| 1kb   | 0.2571     | 0.3428      | -0.0284 |
| 10kb  | 0.3082     | 0.4104      | -0.0688 |
| 100kb | 0.3162     | 0.3967      | -0.0616 |
| 1Mb   | 0.2534     | 0.368       | -0.0679 |

**Multiple Regression with GC and CpG content**

| <b>Coefficient (b)</b> | constant | GC        | CpG      |
|------------------------|----------|-----------|----------|
| 1kb                    | 5.43E-04 | -6.71E-07 | 5.41E-04 |
| 10kb                   | 0.0139   | -0.0003   | 0.0089   |
| 100kb                  | 0.1376   | -0.0026   | 0.0731   |
| 1Mb                    | 2.6939   | -0.0627   | 0.9279   |

  

| <b>p-value</b> | constant | GC        | CpG      |
|----------------|----------|-----------|----------|
| 1kb            | 0        | 0.0071    | 0        |
| 10kb           | 0        | 1.83E-264 | 0        |
| 100kb          | 3.23E-62 | 9.69E-27  | 0.00E+00 |
| 1Mb            | 2.10E-27 | 1.12E-17  | 1.03E-54 |

**Multiple Regression with GC, CpG, and gene content**

| <b>Coefficient (b)</b> | constant | GC        | CpG      | Genes*    |
|------------------------|----------|-----------|----------|-----------|
| 1kb                    | 5.53E-04 | -1.55E-07 | 5.41E-04 | -1.19E-04 |
| 10kb                   | 0.0142   | -0.0003   | 0.009    | -0.0039   |
| 100kb                  | 0.1367   | -0.0023   | 0.0741   | -0.0388   |
| 1Mb                    | 2.2791   | -0.047    | 0.8654   | -0.6019   |

  

| <b>p-value</b> | constant | GC        | CpG      | Genes*   |
|----------------|----------|-----------|----------|----------|
| 1kb            | 0        | 0.5347    | 0        | 0        |
| 10kb           | 0        | 4.33E-236 | 0        | 0        |
| 100kb          | 1.71E-62 | 1.86E-22  | 0.00E+00 | 1.00E-84 |
| 1Mb            | 2.39E-19 | 6.71E-10  | 9.30E-48 | 1.24E-10 |

**Multiple Regression with GC, GC<sup>2</sup>, CpG, and gene content**

| <b>Coefficient (b)</b> | constant | GC       | GC <sup>2</sup> | CpG      | Genes*    |
|------------------------|----------|----------|-----------------|----------|-----------|
| 1kb                    | -0.0015  | 9.96E-05 | -1.25E-06       | 6.48E-04 | -1.15E-04 |
| 10kb                   | -0.0522  | 0.0029   | -3.89E-05       | 0.0113   | -0.0038   |
| 100kb                  | -0.6816  | 0.0369   | -4.77E-04       | 0.1017   | -0.0423   |
| 1Mb                    | -6.2314  | 0.3676   | -0.0052         | 1.1839   | -0.7575   |

  

| <b>p-value</b> | constant  | GC        | GC <sup>2</sup> | CpG      | Genes*    |
|----------------|-----------|-----------|-----------------|----------|-----------|
| 1kb            | 0         | 0         | 0               | 0        | 0         |
| 10kb           | 0         | 0         | 0               | 0        | 0         |
| 100kb          | 5.07E-124 | 5.67E-165 | 1.70E-191       | 0        | 9.07E-104 |
| 1Mb            | 2.62E-12  | 5.02E-18  | 4.67E-23        | 9.71E-69 | 3.91E-16  |

\* Fraction of bin between transcription start end sites
