# Supplementary material for: Genetic Recombination Is Targeted towards Gene Promoter Regions in Dogs
Source: PubMed Central journal article supplement (PMC3861134; doi:10.1371/journal.pgen.1003984), 2013-12-12
Supplement: pgen.1003984.s019.pdf [file pgen.1003984.s019.pdf]

**Table S6: Primers used for qPCR validation of ChIP**

|         |                           |
|---------|---------------------------|
| SYCE1.F | GTGTGTGGCATAAGAGTTTGTGTAT |
| SYCE1.R | AGATTAAAACAGGCAGGAGGAT    |
| MLH1.F  | TAGTGACCCAACTTAGTGTTTTCT  |
| MLH1.R  | CTTTCTCTCCAGGTTCTTAACCTCT |
| Tex12.F | TATATGCACTCATGTCCCACTTAG  |
| Tex12.R | AAACATCTACCCTTTCAGGATACAG |
| Tex26.F | TACTTGCTTGTCAGACTCTAGCA   |
| Tex26.R | GGTATCTTTAGAGCCAATCTAGGAC |

All sequences are listed 5' to 3'
